# Supplementary material
Source: PubMed Central journal article supplement (PMC2702121)
Supplement: NIHMS81430-supplement-3.pdf [file NIHMS81430-supplement-3.pdf]

**Supplemental Table 1. Cortically-evoked responses and spontaneous firing patterns in normal and transgenic mice**

| GPe                    | Normal    |    |                       | Transgenic |    |                       |
|------------------------|-----------|----|-----------------------|------------|----|-----------------------|
|                        | ex-inh-ex | ex | with long-lasting inh | ex-inh-ex  | ex | with long-lasting inh |
| regular                | 1         | 0  | 0                     | 0          | 1  | 0                     |
| bursting               | 1         | 0  | 0                     | 6          | 38 | 40                    |
| irregular non-bursting | 23        | 8  | 0                     | 27         | 15 | 4                     |
| with pauses            | 4         | 0  | 0                     | 8          | 34 | 32                    |
| without pauses         | 21        | 8  | 0                     | 25         | 20 | 12                    |

Values are number of neurons. Numbers of neurons with minor response patterns, such as cortically-evoked ex-inh, inh-ex and inh are omitted. Numbers of neurons without long-lasting inh are not shown. ex, excitation; inh, inhibition.
