# Supplementary material
Source: PubMed Central journal article supplement (PMC2702121)

### A GPI Burst

1 Normal    2 Transgenic

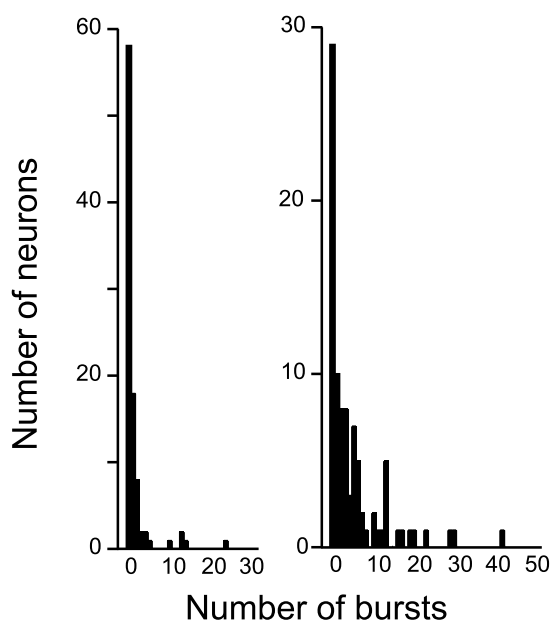

### B GPI Pause

1 Normal    2 Transgenic

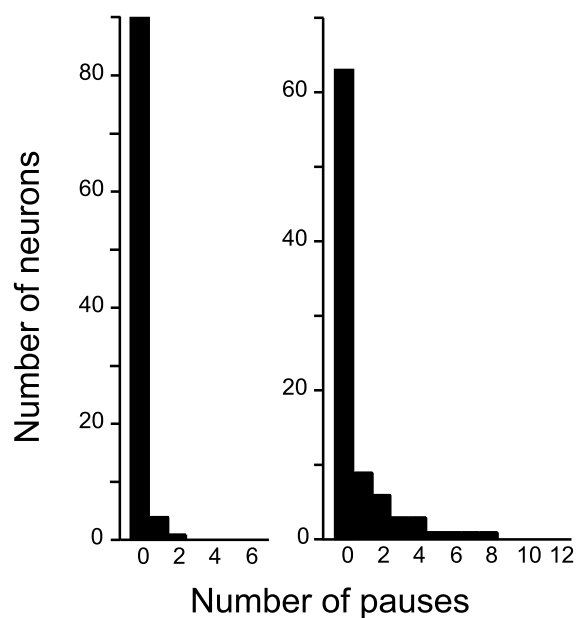

### C GPe Burst

1 Normal    2 Transgenic

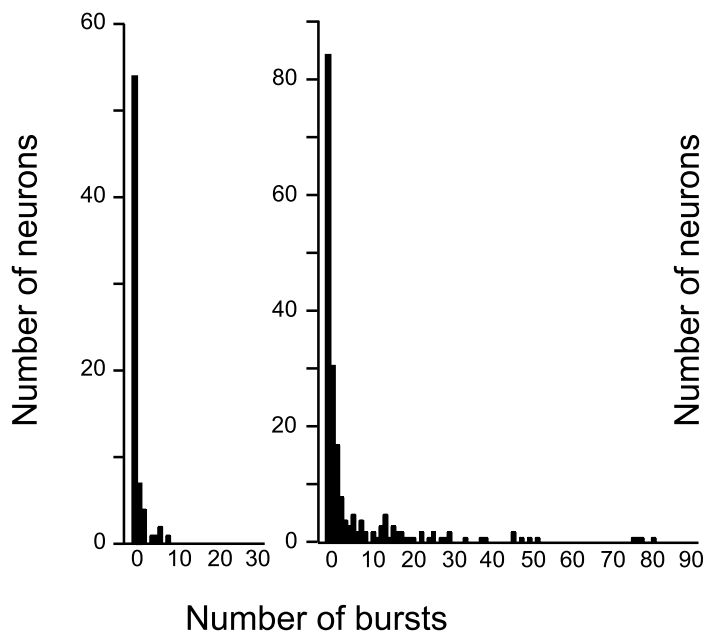

### D GPe Pause

1 Normal    2 Transgenic

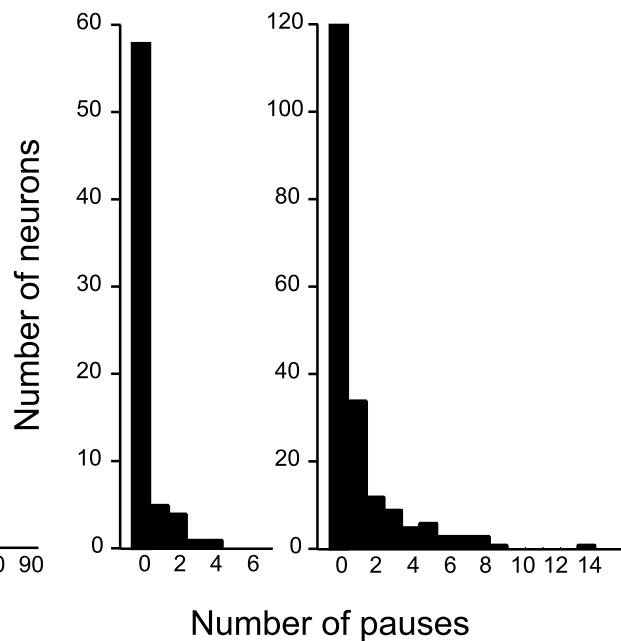

Supplement: NIHMS81430-supplement-suppl_1.pdf [file NIHMS81430-supplement-suppl_1.pdf]
