# Supplementary material
Source: PubMed Central journal article supplement (PMC2702121)

# Normal GPi

A

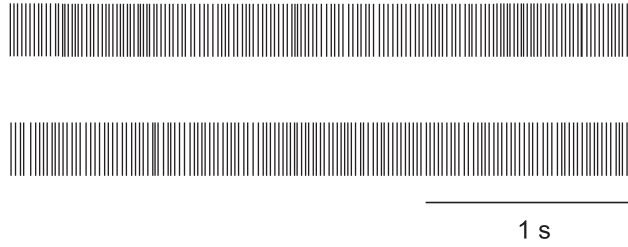

B

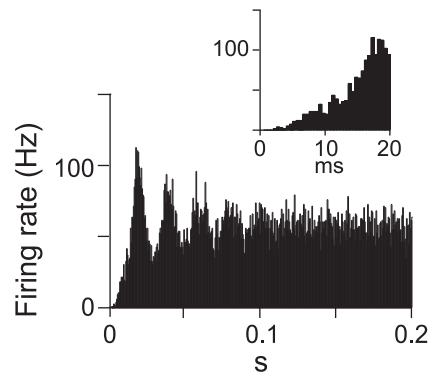

Supplement: NIHMS81430-supplement-suppl_2.pdf [file NIHMS81430-supplement-suppl_2.pdf]
